# Supplementary material for: Imaging P2X4 receptor subcellular distribution, trafficking, and regulation using P2X4-pHluorin
Source: PubMed Central journal article supplement — J Gen Physiol. 2014 Jul;144(1):81–104. doi: 10.1085/jgp.201411169 (PMC4076521; doi:10.1085/jgp.201411169), 2014-07
Supplement: supp_jgp.201411169_JGP_201411169_sm.pdf [file supp_jgp.201411169_JGP_201411169_sm.pdf]

Xu et al., <http://www.jgp.org/cgi/content/full/jgp.201411169/DC1>

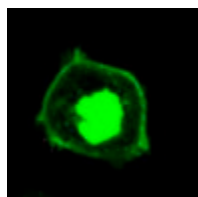

**Video 1.** Confocal Z-series images through a HEK-293 cell expressing P2X4-YFP.

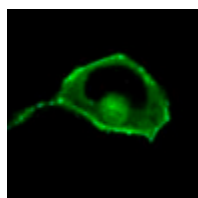

**Video 2.** Confocal Z-series images through a HEK-293 cell expressing P2X4-pHluorin123.

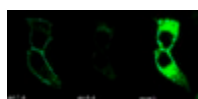

**Video 3.** Confocal Z-series images through a HEK-293 cell expressing P2X4-pHluorin123 at pH 7.4, pH 5.4, and in  $\text{NH}_4\text{Cl}$ .
